# Supplementary material for: Potent Antiviral Activity Against HSV-1 and SARS-CoV-2 by Antimicrobial Peptoids
Source: Preprints.org preprint supplement (doi:10.20944/preprints202103.0258.v1), 2021-03-09

**Supplemental information**

**Supplemental figure 1. LC/MS traces of peptoids**

**LC / MS trace of MXB1.** tR = 3.91 min.Gradient: 5–95% acetonitrile + 0.1% TFA over 6.80 min.
MS (ESI+, [M]+, C104H139N17O12): 1820.70.


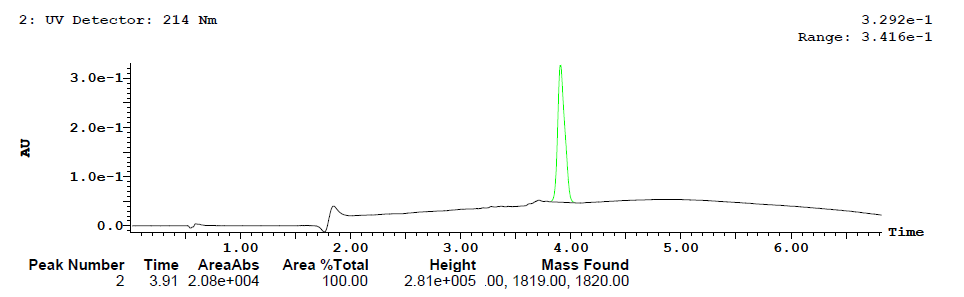


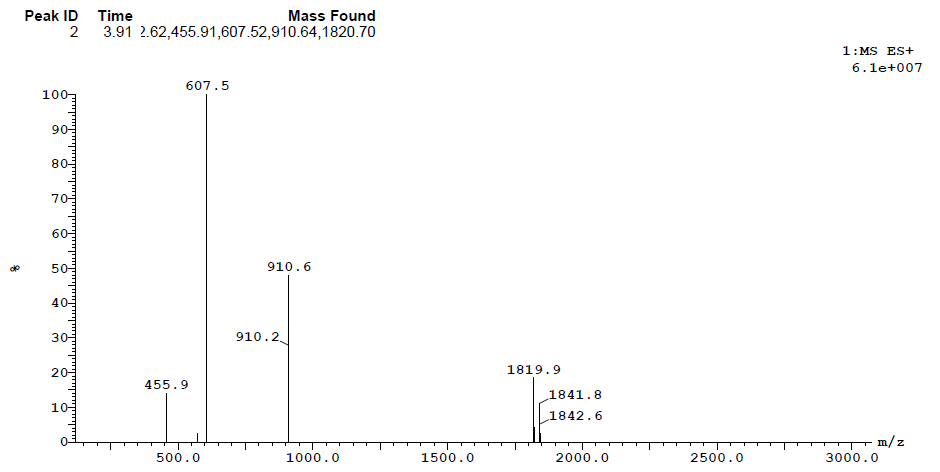


**LC / MS trace of MXB2.** tR = 3.84 min.Gradient: 5–95% acetonitrile + 0.1% TFA over 6.80 min.
MS (ESI+, [M]+, C52H69Br2N9O6): 1074.41.


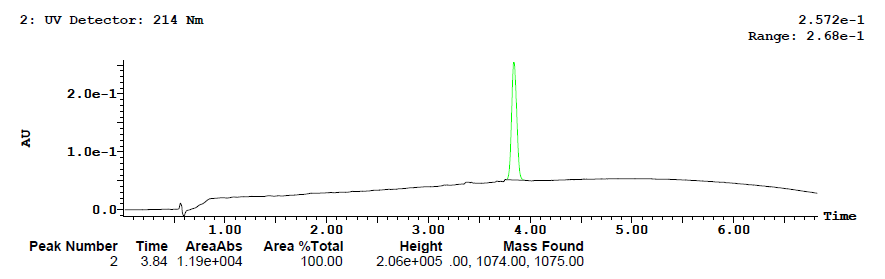


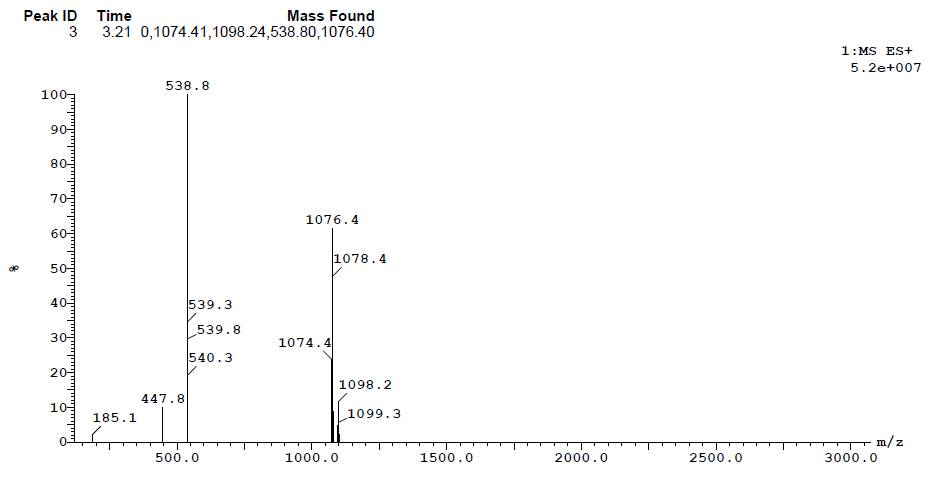


**LC / MS trace of MXB3.** tR = 3.59 min.Gradient: 5–95% acetonitrile + 0.1% TFA over 6.80 min.
MS (ESI+, [M]+, C52H70BrN9O6): 996.50.


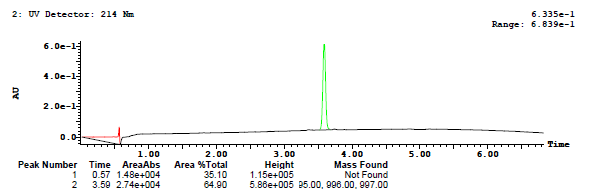


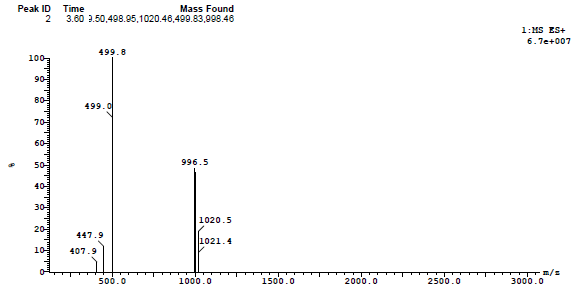


**LC / MS trace of MXB4.** tR = 4.02 min.Gradient: 5–95% acetonitrile + 0.1% TFA over 6.80 min.
MS (ESI+, [M]+, C52H67Br4N9O6): 1233.09.


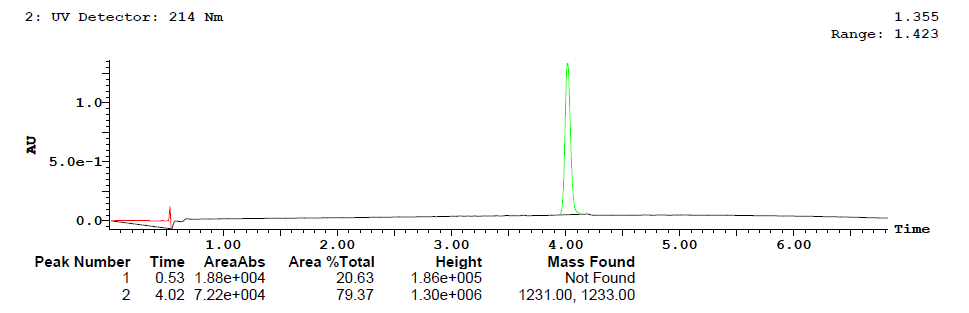


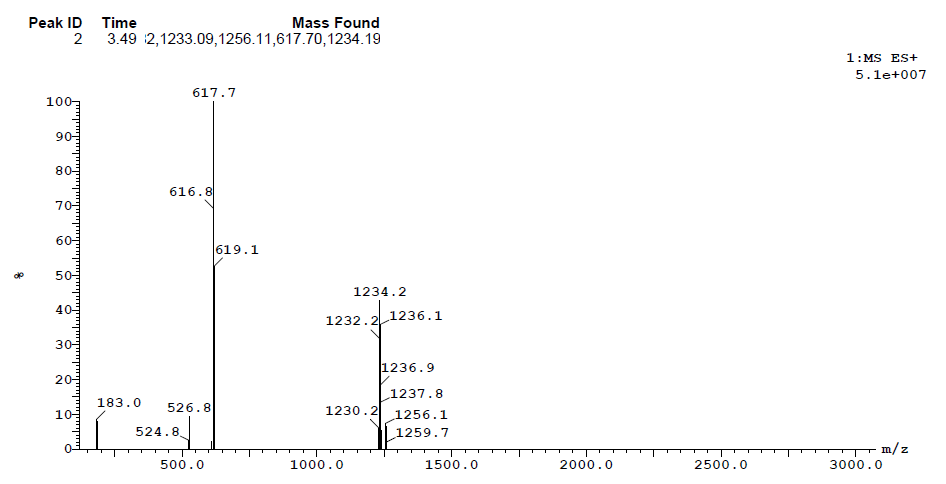


**LC / MS trace of MXB5.** tR = 3.36 min.Gradient: 5–95% acetonitrile + 0.1% TFA over 6.80 min.
MS (ESI+, [M]+, C47H78N8O5): 835.65.


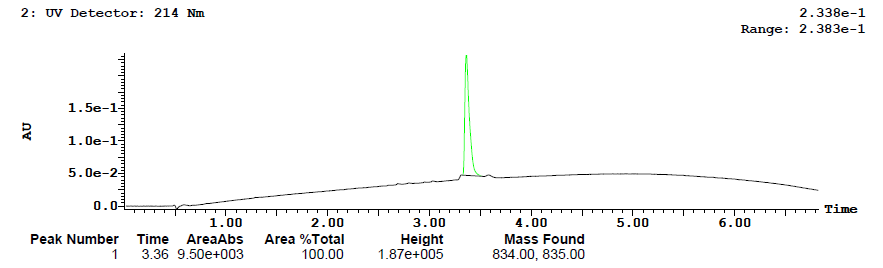


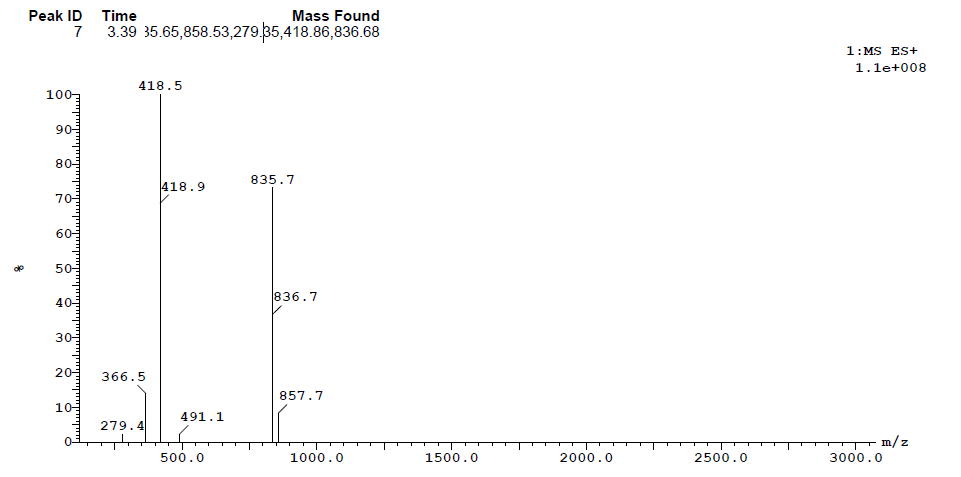


**LC / MS trace of MXB6.** tR = 3.39 min.Gradient: 5–95% acetonitrile + 0.1% TFA over 6.80 min.
MS (ESI+, [M]+, C94H128N16O11): 1658.67.


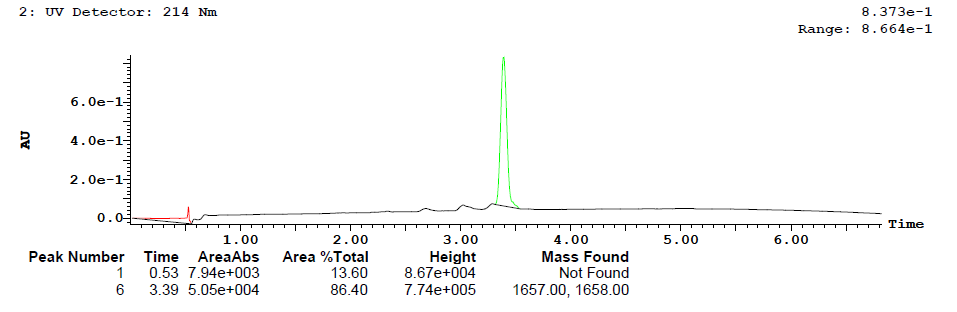


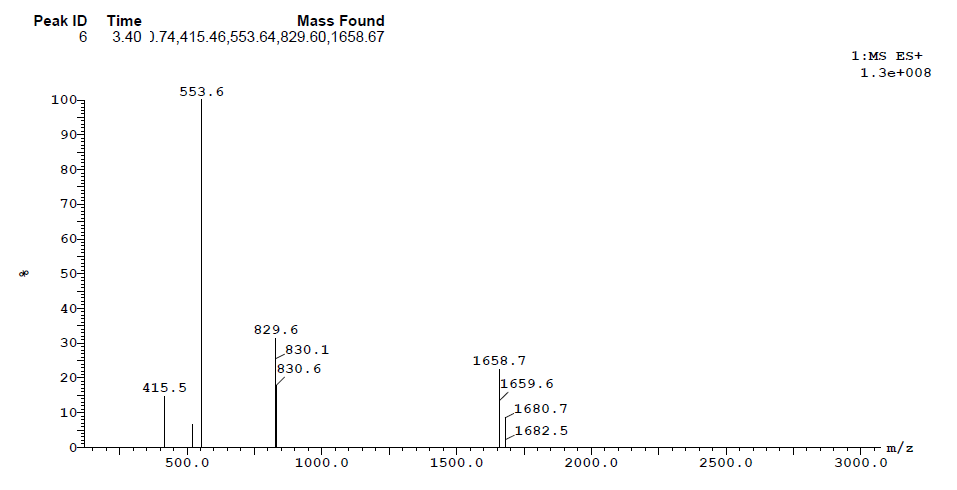


**LC / MS trace of MXB7.** tR = 3.08 min.Gradient: 5–95% acetonitrile + 0.1% TFA over 6.80 min.
MS (ESI+, [M]+, C52H71N9O6): 918.61.


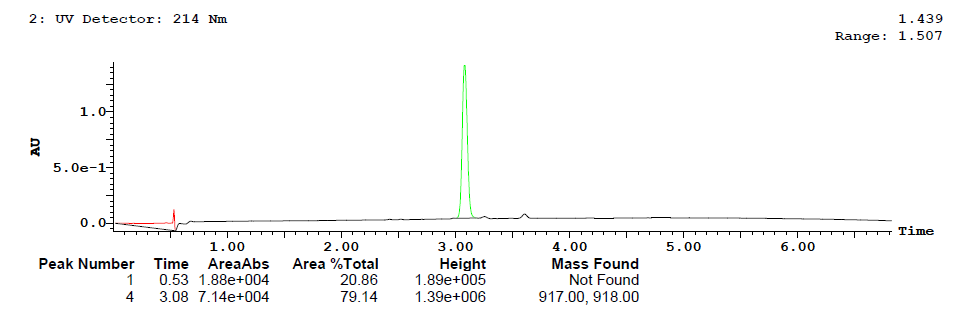


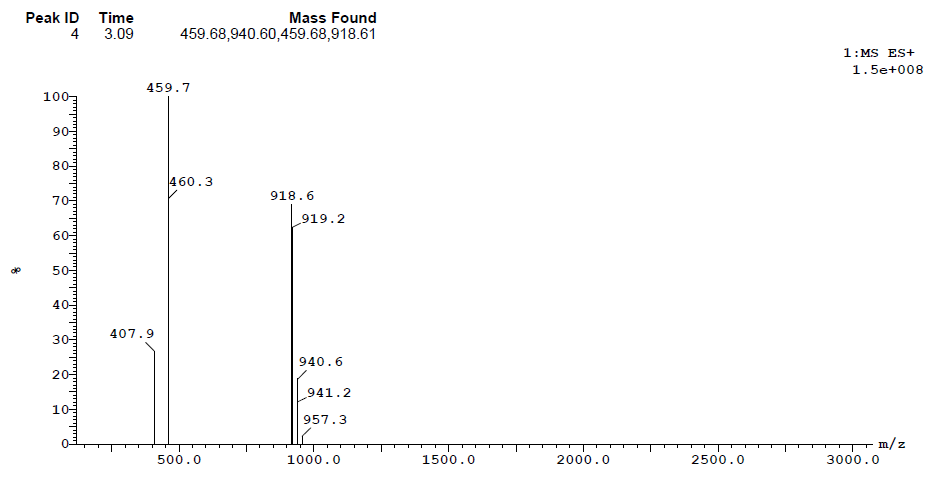


**LC / MS trace of MXB8.** tR = 3.72 min.Gradient: 5–95% acetonitrile + 0.1% TFA over 6.80 min.
MS (ESI+, [M]+, C64H94N10O7): 1115.74.


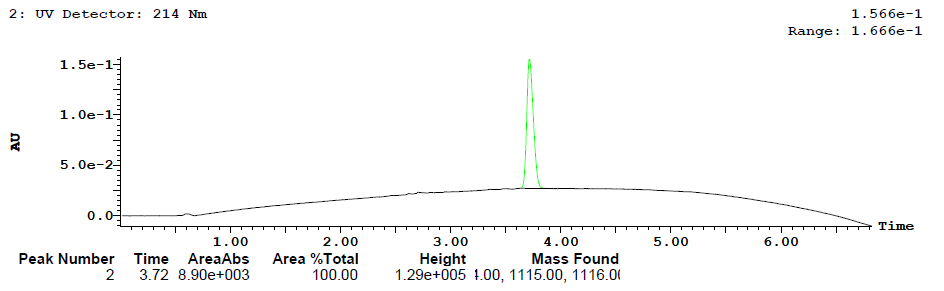


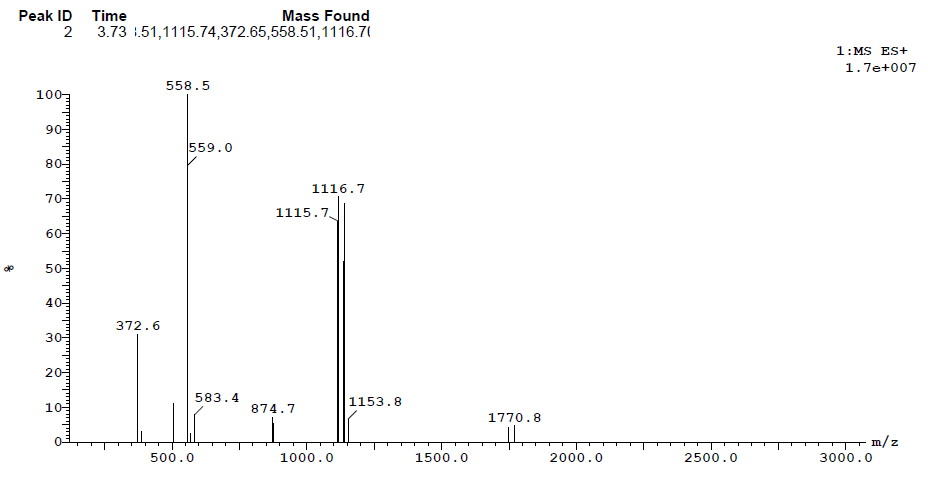


**LC / MS trace of MXB9.** tR = 3.94 min.Gradient: 5–95% acetonitrile + 0.1% TFA over 6.80 min.
MS (ESI+, [M]+, C64H92Br2N10O7): 1271.50.


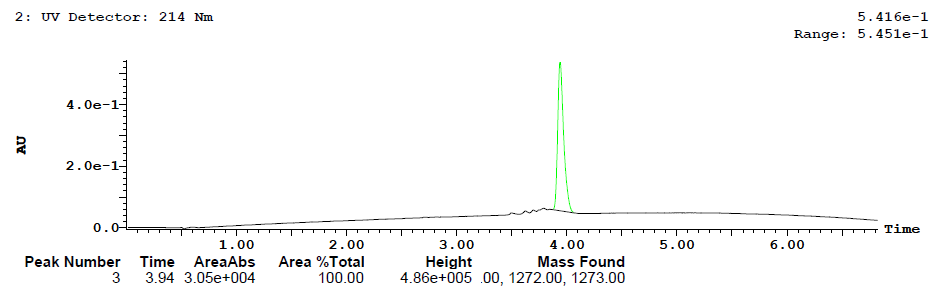


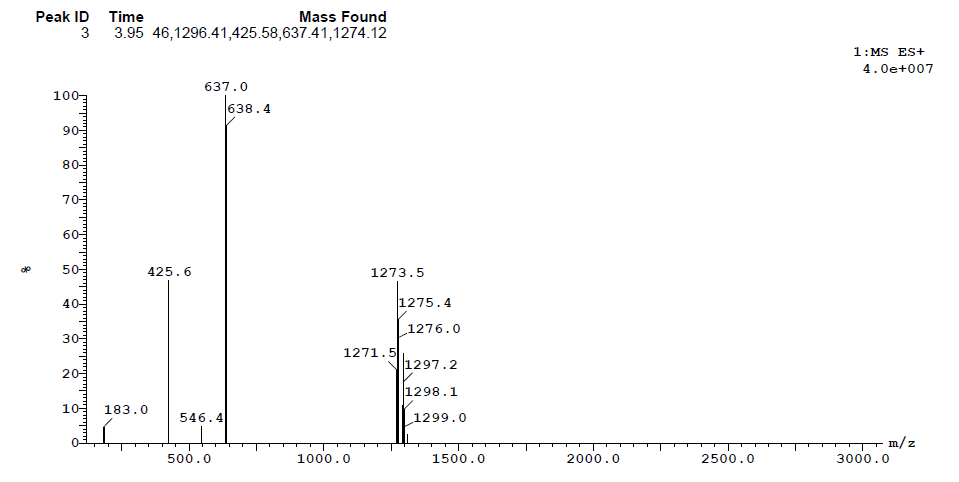


**LC / MS trace of MXB10.** tR = 4.22 min.Gradient: 5–95% acetonitrile + 0.1% TFA over 6.80 min.
MS (ESI+, [M]+, C67H98Br2N10O7): 1315.53.


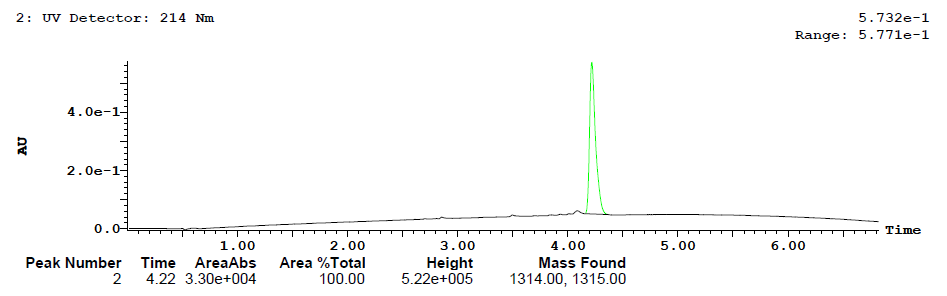


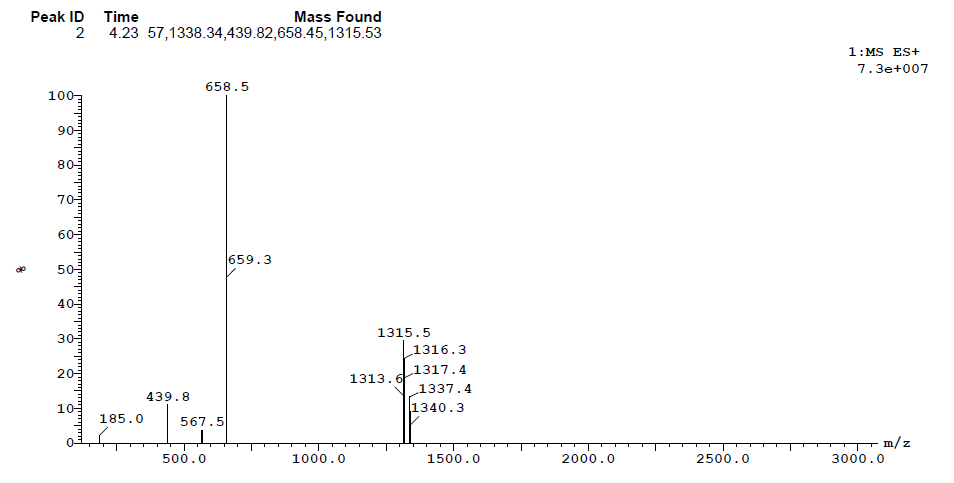

Supplement: Supplementary file 2 [file supplementary]
